# Supplementary material for: Autologous Bone Grafts versus Alloplastic Implants for Orbital Floor Reconstruction: A Systematic Review and Meta-Analysis
Source: Research Square preprint supplement (doi:10.21203/rs.3.rs-8368389/v1), 2026-01-16

## Risk of bias domains

| Study | Risk of bias domains |                                                                                    |                                                                                     |                                                                                      |                                                                                      |                                                                                      |
|-------|----------------------|------------------------------------------------------------------------------------|-------------------------------------------------------------------------------------|--------------------------------------------------------------------------------------|--------------------------------------------------------------------------------------|--------------------------------------------------------------------------------------|
|       | D1                   | D2                                                                                 | D3                                                                                  | D4                                                                                   | D5                                                                                   | Overall                                                                              |
|       | Ram, 2010            | 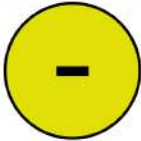  |   |   |   |   |
|       | Kozakiewicz, 2013    |   |   |   |   |   |
|       | Zuo, 2020            |   |   |   |   |   |
|       | De-Moraes, 2021      |  |  |  |  |  |

Domains:

D1: Bias arising from the randomization process.

D2: Bias due to deviations from intended intervention.

D3: Bias due to missing outcome data.

D4: Bias in measurement of the outcome.

D5: Bias in selection of the reported result.

Judgement

 High

 Some concerns

 Low

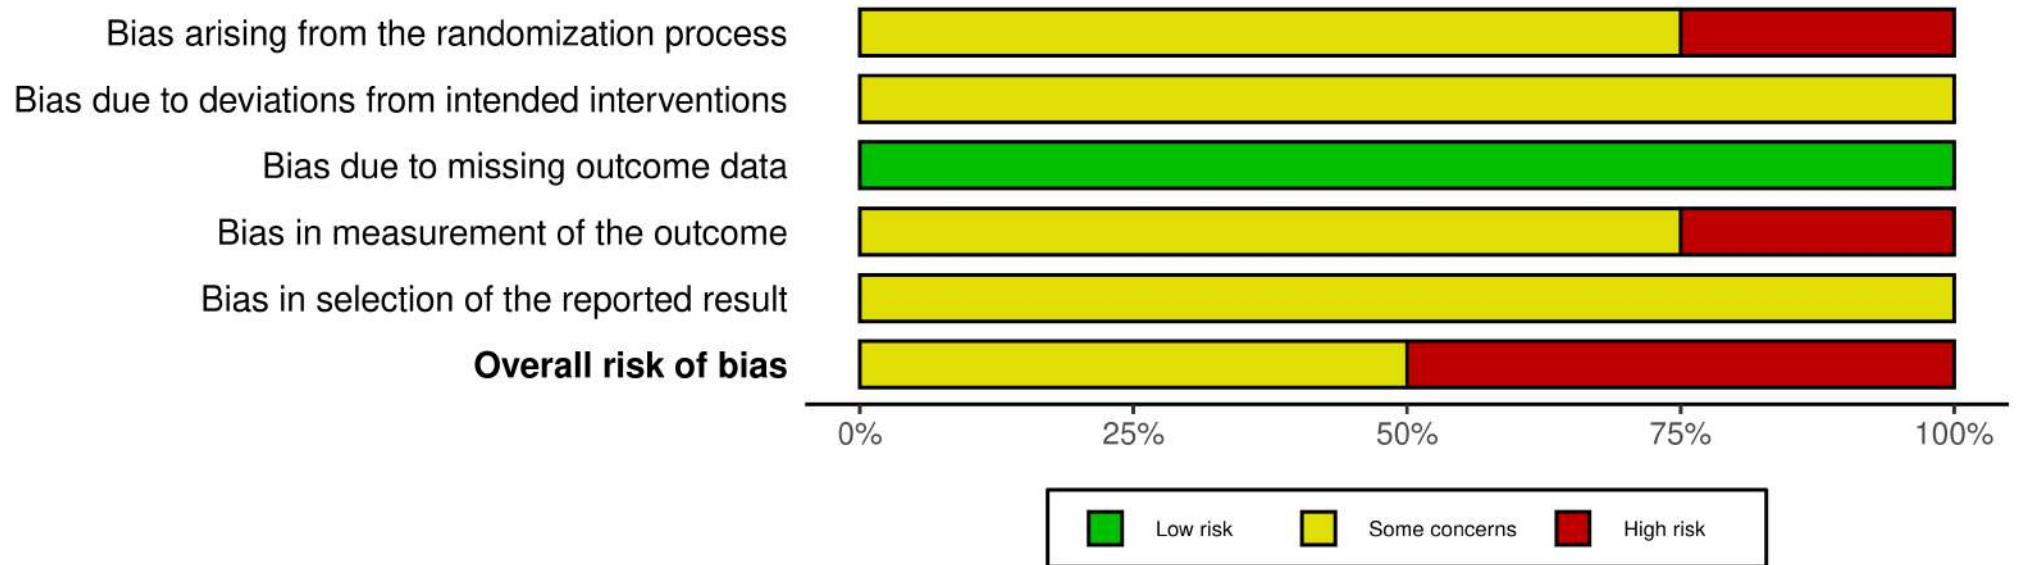

Supplement: Supplementary file 1 [file 938ef2403eba2489d6e8639c.pdf]
