# Supplementary material for: Autologous Bone Grafts versus Alloplastic Implants for Orbital Floor Reconstruction: A Systematic Review and Meta-Analysis
Source: Research Square preprint supplement (doi:10.21203/rs.3.rs-8368389/v1), 2026-01-16
Supplement: Supplementary file 1 [file d40b4112851ba474456bb8de.docx]

Supplementary Table 1

| **Database** | **Search build** | **Number of results** |
| --- | --- | --- |
| PubMed | ("Orbital Reconstruction" OR "Orbital Repair" OR "Orbital Restoration" OR "Orbital Augmentation" OR "Orbital Surgery" OR "Orbital Fracture" OR "Orbital Fractures" OR "Blowout Fracture" OR "Orbital Trauma" OR "Orbital Injury" OR "Periorbital Trauma" OR "Periorbital Injury" OR "Zygomaticomaxillary Complex Fracture" OR "ZMC Fracture" OR "Trapdoor Fracture" OR "Orbital Floor Defect" OR "Orbital Wall Defect" OR "Midface Fracture" OR "Facial Bone Fracture" OR "Maxillofacial Trauma" OR "Maxillofacial Fracture" OR "NOE Fracture" OR "Naso-orbito-ethmoid Fracture" OR "Orbital Wall Fracture" OR "Orbital Floor Fracture" OR "Cranio-maxillofacial Fracture" OR "Oculofacial Trauma") AND ("Autologous" OR "Autologous Graft" OR "Bone Graft" OR "Cartilage Graft" OR "Autograft" OR "Autogenous" OR "Autoplasty" OR "Autotransplant" OR "Self Graft" OR "Self-derived" OR "Self-harvested" OR "Native Tissue" OR "Patient's Own") AND ("Alloplastic" OR "Synthetic" OR "Inorganic Bone Substitute" OR Artificial OR Alloplast OR "Bioceramic Material" OR "Bioactive Glass" OR "Porous Polyethylene Implant" OR "Medpor" OR Titanium OR "Silicone Implant" OR "Polymer Implant" OR "Bioinert Synthetic Material" OR "Prosthetic Material" OR "Man-made" OR "Biocompatible Synthetic Material" OR "Resorbable Implant" OR "Hydroxyapatite" OR "Methyl Methacrylate" OR "Gore-Tex" OR "Polylactic Acid" OR "PGA" OR "PHBV Polymer") | 149 |
| WEB OF SCIENCE | ("Orbital Reconstruction" OR "Orbital Repair" OR "Orbital Restoration" OR "Orbital Augmentation" OR "Orbital Surgery" OR "Orbital Fracture" OR "Orbital Fractures" OR "Blowout Fracture" OR "Orbital Trauma" OR "Orbital Injury" OR "Periorbital Trauma" OR "Periorbital Injury" OR "Zygomaticomaxillary Complex Fracture" OR "ZMC Fracture" OR "Trapdoor Fracture" OR "Orbital Floor Defect" OR "Orbital Wall Defect" OR "Midface Fracture" OR "Facial Bone Fracture" OR "Maxillofacial Trauma" OR "Maxillofacial Fracture" OR "NOE Fracture" OR "Naso-orbito-ethmoid Fracture" OR "Orbital Wall Fracture" OR "Orbital Floor Fracture" OR "Cranio-maxillofacial Fracture" OR "Oculofacial Trauma") AND ("Autologous" OR "Autologous Graft" OR "Bone Graft" OR "Cartilage Graft" OR "Autograft" OR "Autogenous" OR "Autoplasty" OR "Autotransplant" OR "Self Graft" OR "Self-derived" OR "Self-harvested" OR "Native Tissue" OR "Patient's Own") AND ("Alloplastic" OR "Synthetic" OR "Inorganic Bone Substitute" OR Artificial OR Alloplast OR "Bioceramic Material" OR "Bioactive Glass" OR "Porous Polyethylene Implant" OR "Medpor" OR Titanium OR "Silicone Implant" OR "Polymer Implant" OR "Bioinert Synthetic Material" OR "Prosthetic Material" OR "Man-made" OR "Biocompatible Synthetic Material" OR "Resorbable Implant" OR "Hydroxyapatite" OR "Methyl Methacrylate" OR "Gore-Tex" OR "Polylactic Acid" OR "PGA" OR "PHBV Polymer") | 121 |
| Scopus | TITLE-ABS-KEY("Orbital Reconstruction" OR "Orbital Repair" OR "Orbital Restoration" OR "Orbital Augmentation" OR "Orbital Surgery" OR "Orbital Fracture" OR "Orbital Fractures" OR "Blowout Fracture" OR "Orbital Trauma" OR "Orbital Injury" OR "Periorbital Trauma" OR "Periorbital Injury" OR "Zygomaticomaxillary Complex Fracture" OR "ZMC Fracture" OR "Trapdoor Fracture" OR "Orbital Floor Defect" OR "Orbital Wall Defect" OR "Midface Fracture" OR "Facial Bone Fracture" OR "Maxillofacial Trauma" OR "Maxillofacial Fracture" OR "NOE Fracture" OR "Naso-orbito-ethmoid Fracture" OR "Orbital Wall Fracture" OR "Orbital Floor Fracture" OR "Cranio-maxillofacial Fracture" OR "Oculofacial Trauma") AND TITLE-ABS-KEY("Autologous" OR "Autologous Graft" OR "Bone Graft" OR "Cartilage Graft" OR "Autograft" OR "Autogenous" OR "Autoplasty" OR "Autotransplant" OR "Self Graft" OR "Self-derived" OR "Self-harvested" OR "Native Tissue" OR "Patient's Own") AND TITLE-ABS-KEY("Alloplastic" OR "Synthetic" OR "Inorganic Bone Substitute" OR Artificial OR Alloplast OR "Bioceramic Material" OR "Bioactive Glass" OR "Porous Polyethylene Implant" OR "Medpor" OR Titanium OR "Silicone Implant" OR "Polymer Implant" OR "Bioinert Synthetic Material" OR "Prosthetic Material" OR "Man-made" OR "Biocompatible Synthetic Material" OR "Resorbable Implant" OR "Hydroxyapatite" OR "Methyl Methacrylate" OR "Gore-Tex" OR "Polylactic Acid" OR "PGA" OR "PHBV Polymer") | 266 |
| Cochrane | ("Orbital Reconstruction" OR "Orbital Repair" OR "Orbital Restoration" OR "Orbital Augmentation" OR "Orbital Surgery" OR "Orbital Fracture" OR "Orbital Fractures" OR "Blowout Fracture" OR "Orbital Trauma" OR "Orbital Injury" OR "Periorbital Trauma" OR "Periorbital Injury" OR "Zygomaticomaxillary Complex Fracture" OR "ZMC Fracture" OR "Trapdoor Fracture" OR "Orbital Floor Defect" OR "Orbital Wall Defect" OR "Midface Fracture" OR "Facial Bone Fracture" OR "Maxillofacial Trauma" OR "Maxillofacial Fracture" OR "NOE Fracture" OR "Naso-orbito-ethmoid Fracture" OR "Orbital Wall Fracture" OR "Orbital Floor Fracture" OR "Cranio-maxillofacial Fracture" OR "Oculofacial Trauma") AND ("Autologous" OR "Autologous Graft" OR "Bone Graft" OR "Cartilage Graft" OR "Autograft" OR "Autogenous" OR "Autoplasty" OR "Autotransplant" OR "Self Graft" OR "Self-derived" OR "Self-harvested" OR "Native Tissue" OR "Patient's Own") AND ("Alloplastic" OR "Synthetic" OR "Inorganic Bone Substitute" OR Artificial OR Alloplast OR "Bioceramic Material" OR "Bioactive Glass" OR "Porous Polyethylene Implant" OR "Medpor" OR Titanium OR "Silicone Implant" OR "Polymer Implant" OR "Bioinert Synthetic Material" OR "Prosthetic Material" OR "Man-made" OR "Biocompatible Synthetic Material" OR "Resorbable Implant" OR "Hydroxyapatite" OR "Methyl Methacrylate" OR "Gore-Tex" OR "Polylactic Acid" OR "PGA" OR "PHBV Polymer") | 9 |
|  |  |  |
|  | |  |
|  | |  |

**Date of searching**: 18/8/2025

**Total** : 545

**Duplicates**: 204

**Total after removing duplicates**: 341
